# Supplementary material for: Positive impact of low-dose, high-energy radiation on bone in partial- and/or full-weightbearing mice
Source: PubMed Central journal article supplement (PMC6547738; doi:10.1038/s41526-019-0074-3), 2019-06-04
Supplement: 41526_2019_74_MOESM1_ESM.pdf [file 41526_2019_74_MOESM1_ESM.pdf]

Supplementary Table 1.

Tally of samples numbers for each outcome variable + number of outliers detected/excluded (Grubbs test)

| Location/Test                 | Measure                                        | WB-Sham                    |          | WB-Rad                     |          | G/6-Sham                   |          | G/6-Rad                    |          |
|-------------------------------|------------------------------------------------|----------------------------|----------|----------------------------|----------|----------------------------|----------|----------------------------|----------|
|                               |                                                | Number of Samples Assessed | Outliers | Number of Samples Assessed | Outliers | Number of Samples Assessed | Outliers | Number of Samples Assessed | Outliers |
| Whole body                    | Body Mass                                      | 5                          |          | 9                          |          | 5                          |          | 7                          |          |
| Whole body                    | L. Soleus Mass                                 | 9                          |          | 9                          |          | 8                          |          | 8                          |          |
| Whole body                    | R. Soleus Mass                                 | 9                          |          | 9                          |          | 8                          |          | 8                          |          |
| Distal Femur                  | Percent Bone Volume (%)                        | 5                          |          | 8                          |          | 5                          |          | 8                          |          |
| Distal Femur                  | Trabecular Thickness (mm)                      | 5                          |          | 8                          |          | 5                          |          | 8                          |          |
| Distal Femur                  | Trabecular Number (#)                          | 5                          |          | 8                          |          | 5                          |          | 8                          |          |
| L4 Spine                      | Percent Bone Volume (%)                        | 8                          |          | 7                          |          | 8                          |          | 8                          |          |
| L4 Spine                      | Trabecular Thickness (mm)                      | 8                          |          | 7                          |          | 8                          |          | 8                          |          |
| L4 Spine                      | Trabecular Number (#)                          | 8                          |          | 7                          |          | 8                          |          | 8                          |          |
| Mid Shaft Femur 3 point bend  | Ultimate Load (N)                              | 5                          |          | 8                          |          | 5                          |          | 7                          | 1        |
| Mid Shaft Femur 3 point bend  | Stiffness (N/mm)                               | 4                          | 1        | 8                          |          | 5                          |          | 7                          | 1        |
| Mid Shaft Femur 3 point bend  | Energy-to-Ultimate (mJ)                        | 5                          |          | 8                          |          | 5                          |          | 8                          |          |
| Mid Shaft Femur 3 point bend  | Energy-to-Fracture (mJ)                        | 5                          |          | 8                          |          | 5                          |          | 8                          |          |
| Mid Shaft Femur 3 point bend  | Post-yield Energy (mJ)                         | 5                          |          | 8                          |          | 5                          |          | 8                          |          |
| Femoral Neck Compression Test | Ultimate Load (N)                              | 7                          |          | 8                          |          | 7                          |          | 7                          |          |
| Femoral Neck Compression Test | Stiffness (N/mm)                               | 7                          |          | 8                          |          | 7                          |          | 7                          |          |
| L4 Compression Test           | Ultimate Load (N)                              | 6                          |          | 6                          |          | 7                          |          | 4                          |          |
| L4 Compression Test           | Stiffness (N/mm)                               | 6                          |          | 6                          |          | 7                          |          | 4                          |          |
| Distal Femur                  | MS/BS (%)                                      | 6                          |          | 5                          |          | 8                          |          | 4                          |          |
| Distal Femur                  | MAR ( $\mu\text{m}/\text{d}$ )                 | 6                          |          | 5                          |          | 8                          |          | 4                          |          |
| Distal Femur                  | BFR ( $\mu\text{m}^3/\mu\text{m}^2/\text{y}$ ) | 6                          |          | 5                          |          | 8                          |          | 4                          |          |
| Mid Shaft Tibia               | Endocortical MS/BS (%)                         | 4                          |          | 7                          |          | 5                          |          | 7                          |          |
| Mid Shaft Tibia               | Periosteal MS/BS (%)                           | 3                          | 1        | 7                          |          | 5                          |          | 7                          |          |
